# Supplementary material for: Genome-wide analysis of cell-Free DNA methylation profiling with MeDIP-seq identified potential biomarkers for colorectal cancer
Source: World J Surg Oncol. 2022 Jan 22;20:21. doi: 10.1186/s12957-022-02487-4 (PMC8783473; doi:10.1186/s12957-022-02487-4)
Supplement: Supplementary file 3 — Additional file 3: Supplementary Table 3. 12 Illumina HM450K BeadChip Array probes corresponding to 16 candidate DMRs. [file 12957_2022_2487_MOESM3_ESM.xlsx]

## Sheet: Sheet1
Supplementary Table 3: 12 Illumina HM450K BeadChip Array probes corresponding to 16 candidate DMRs
IlmnID	Genome_Build	CHR	start	end	SourceSeq	Strand	UCSC_RefGene_Name	UCSC_RefGene_Accession	UCSC_RefGene_Group	UCSC_CpG_Islands_Name	Relation_to_UCSC_CpG_Island	DMR	HMM_Island
cg01295203	37	8	70984199	70984248	CGCGCAGGCTCTGAAAACCAAGGTCCAGACCCATACCGAGCGCCCAAAGA	F	PRDM14	NM_024504	TSS1500	chr8:70981873-70984888	Island	DMR	8:71144880-71147746
cg04838988	37	8	70984437	70984486	CTGCCAGGCCGGGGGTGAGGCTGCACCTCAGTCTTCAGCCCCGAAGGCCG	F	PRDM14	NM_024504	TSS1500	chr8:70981873-70984888	Island	DMR	8:71144880-71147746
cg18035229	37	8	70984270	70984319	TCTGTGAATGTGAATGGAACTAAGCGTTCCTTTCTCTCCCTCAATGGCCG	F	PRDM14	NM_024504	TSS1500	chr8:70981873-70984888	Island	DMR	8:71144880-71147746
cg21671806	37	8	85097031	85096982	CGCCCCTCCTGCTGTGCAAGTGGCCCTCGGAGAACTTACAGGGCCCGCCG	R	RALYL;RALYL;RALYL;RALYL	NM_001100391;NM_173848;NM_001100392;NM_001100393	TSS200;5'UTR;5'UTR;5'UTR	chr8:85096759-85097247	Island	DMR	8:85259203-85259802
cg15648026	37	11	107461798	107461847	AGGCTTCCCTGGGAGCACGAAGCGGGCGGCTACTGAGCATGCCCAGTCCG	F	ELMOD1;ELMOD1;LOC643923	NM_018712;NM_001130037;NR_028328	TSS200;TSS200;TSS1500	chr11:107461743-107462648	Island	DMR	11:106966405-106968152
cg09628838	37	17	32906394	32906345	TCATTAAGGAGCCGCGCGCGCCGCCAGGCTAGGAATGCGGAATGGACACG	R	C17orf102;TMEM132E	NM_207454;NM_207313	TSS200;TSS1500	chr17:32905965-32908951	Island	DMR	17:29930121-29931616
cg08967802	37	17	32906454	32906405	AGGGGGAGCTAGGAGTCGGGGAGTCTCCGTGGCGCGCGAGCTGTGGGCCG	R	C17orf102;TMEM132E	NM_207454;NM_207313	TSS200;TSS1500	chr17:32905965-32908951	Island	DMR	17:29930121-29931616
cg04906989	37	17	32906456	32906407	CGCGGCCCACAGCTCGCGCGCCACGGAGACTCCCCGACTCCTAGCTCCCC	R	C17orf102;TMEM132E	NM_207454;NM_207313	TSS200;TSS1500	chr17:32905965-32908951	Island	DMR	17:29930121-29931616
cg04790084	37	17	32906622	32906573	CGAGCGCGAGTGTGTGTGTCTCTCTCGAGTCATTTACGGCGGAGCAGCCG	R	TMEM132E;C17orf102	NM_207313;NM_207454	TSS1500;TSS1500	chr17:32905965-32908951	Island	DMR	17:29930121-29931616
cg23791505	37	17	32906991	32907040	ACAAACCTTGAACTTTTCTGGGGTTCAGAGTCTCCGACGCCTCCTCCCCG	F	TMEM132E;C17orf102	NM_207313;NM_207454	TSS1500;TSS1500	chr17:32905965-32908951	Island	DMR	17:29930121-29931616
cg00196787	37	17	32907132	32907181	CTTGATGACCATAAACGCTGTAAGATGCAGAGGGGCTCCTGCAGCTCACG	F	TMEM132E;C17orf102	NM_207313;NM_207454	TSS1500;TSS1500	chr17:32905965-32908951	Island	DMR	17:29930121-29931616
cg06459443	37	17	32907388	32907339	CGCGCTTTCTCCAGTCTGGATCAGGGCCCAGGCTCCACACAGGCCGGCTC	R	TMEM132E;C17orf102	NM_207313;NM_207454	TSS1500;TSS1500	chr17:32905965-32908951	Island	DMR	17:29930121-29931616
